# Supplementary material for: CPVL promotes glioma progression via STAT1 pathway inhibition through interactions with the BTK/p300 axis
Source: PubMed Central journal article supplement (PMC8783677; doi:10.1172/jci.insight.146362), 2021-12-22
Supplement: jciinsight-6-146362-s156.pdf [file jciinsight-6-146362-s156.pdf]

**Supplementary Table 2. Primers used for PCR amplifications**

| Gene           | Primer (5'-3') |                          |
|----------------|----------------|--------------------------|
| CPVL           | Forward        | TCAACCTGAACGGAATTGCTA    |
|                | Reverse        | GAAGGATCACTTGTTAAGTCGC   |
| IRF9           | Forward        | CCGAAACTCCGGAAGTGGG      |
|                | Reverse        | GGCCTTGAAGAAGGCAGCAT     |
| NF- $\kappa$ B | Forward        | CGGCTGAGTCCTGCTCCTTCC    |
|                | Reverse        | TGGAGGCTGCCTGGATCACTTC   |
| IFITM2         | Forward        | AGACCTCCGTGCCTGACCATG    |
|                | Reverse        | CGTCGCCAACCATCTTCCTGTC   |
| IRF1           | Forward        | CACTGTCGCCATGTGCTGTCAG   |
|                | Reverse        | TGCCACTCCGACTGCTCCAAG    |
| BAK            | Forward        | GGACGACATCAACCGACGCTATG  |
|                | Reverse        | AACAGGCTGGTGGCAATCTTGG   |
| TAP1           | Forward        | ACAGCCAGTTACAGGTGGAGCAG  |
|                | Reverse        | CCGGATAGCGCCTCCTTCCAG    |
| IFITM3         | Forward        | GCATTGCCTACTCCGTGAAGTC   |
|                | Reverse        | ACTTGGCGGTGGAGGCATAGG    |
| IFITM1         | Forward        | GATCAACATCCACAGCGAGACCTC |
|                | Reverse        | GACTTCACGGAGTAGGCGAATGC  |
| PSMB8          | Forward        | GAGACAGCTATTCTGGAGGCGTTG |
|                | Reverse        | GTGCAGCAGGTCCTGACATCTG   |
| IFI35          | Forward        | CTCGGTACTGGTGCTCAACATTCC |
|                | Reverse        | ACTCAGAGGTGAAGACTGCTAGGC |
| BCl-2          | Forward        | ACTGAGTACCTGAACCGGCATC   |
|                | Reverse        | GGAGAAATCAAACAGAGGTTCGC  |
| BAX            | Forward        | AGTGTCTCAGGCGAATTGGC     |
|                | Reverse        | CACGGAAGAAGACCTCTCGG     |
| BTK            | Forward        | CCAATGGCTGCCTCCTGAACTAC  |
|                | Reverse        | TCGGTGAAGGAACTGCTTTGACTC |
| GAPDH          | Forward        | TGACTTCAACAGCGACACCCA    |
|                | Reverse        | CACCCTGTTGCTGTAGCCAAA    |
